# Supplementary material for: Implementation of an Integrated Lung Cancer Prevention and Screening Program Using a Mobile Computed Tomography (CT) Unit in Brazil
Source: PubMed Central journal article supplement — Cancer Control. 2022 Oct 7;29:10732748221121385. doi: 10.1177/10732748221121385 (PMC9549090; doi:10.1177/10732748221121385), 2022-10-07

**Supplementary Figure 1:** Integration of processes: municipal health unities throughout the city (red small figures scattered on the left) offer tobacco cessation programs and select high-risk individuals to perform LDCT screening on the mobile unit or BCH (gray small figure on the bottom left).

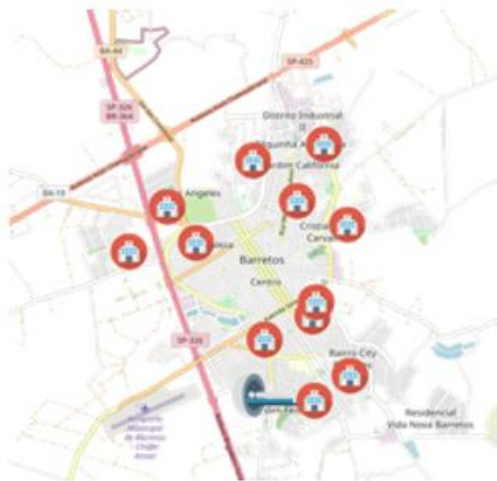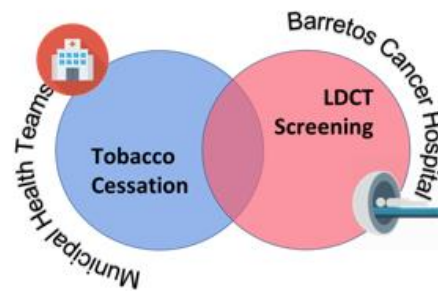

Supplement: sj-pdf-1-ccx-10.1177_10732748221121385.pdf [file sj-pdf-1-ccx-10.1177_10732748221121385.pdf]
